# Supplementary material for: Synthesis and solvent driven self-aggregation studies of meso-“C-glycoside”-porphyrin derivatives
Source: Royal Society of Chemistry journal article supplement (doi:10.1039/b616096d), 2007-01-01
Supplement: b616096d.pdf [file b616096d.pdf]

**SYNTHESIS AND SOLVENT DRIVEN SELF-AGGREGATION STUDIES OF *meso*-“C-GLYCOSIDE”-PORPHYRIN DERIVATIVES**

**PETR ŠTĚPÁNEK<sup>a</sup>, MYKHAYLO DUKH<sup>b</sup>, DAVID ŠAMAN<sup>b</sup>, JITKA MORAVCOVÁ<sup>a</sup>,  
LADISLAV KNIEŽO<sup>b</sup>, DONATO MONTI<sup>c</sup>, MARIANO VENANZI<sup>c</sup>, GIOVANNA MANCINI<sup>d</sup>,  
and PAVEL DRAŠAR<sup>a,b\*</sup>**

<sup>a</sup>*Institute of Organic Chemistry and Biochemistry, AS CR, Flemingovo nám. 2, CZ-166 10 Praha 6,*

<sup>b</sup>*Institute of Chemical Technology, Technická 5, CZ-166 28 Praha 6, Czech Republic* <sup>c</sup>*Dip. Sci. Tecnol. Chim., Univ. Roma “Tor Vergata”, I-00133 Rome;* <sup>d</sup>*IMR-CNR, c/o Dip. Chim., Univ. Roma “La Sapienza”, I-00185 Rome, Italy*

*E-mail: petr.stepanek@centrum.cz, Pavel.Drasar@vscht.cz*

**5,10,15,20-Tetrakis-(2,3,4,6-tetra-*O*-benzyl- $\alpha$ -D-galactopyranosyl-methyl)porphyrin **2****

IR (CHCl<sub>3</sub>) *porphyrin*:  $\nu$ (NH): 3319  $\omega$  - free, 3229  $\omega$ , br - fixed; *pyrrole*  $\nu$ (C=C): 1575  $\omega$ ,  $\nu$ (C=N): 1482  $\omega$ ; 900  $\omega$ , 888  $\omega$ ; *BnO*-:  $\nu_{as}$ (CH<sub>2</sub>): 2922 m, br;  $\nu_s$ (CH<sub>2</sub>): 2871 m;  $\beta_s$ (CH<sub>2</sub>): 1357 m;  $\gamma_s$ (CH<sub>2</sub>): 1334  $\omega$ ;  $\nu_{as}$ (COC): 1092 vs, 1125 s,sh;  $\nu$ (=C-H): 3090  $\omega$  (20a), 3067  $\omega$  (2), 3033 m (20b);  $\nu$ (ring): 1604  $\omega$  (8a), 1585  $\omega$  (8b), 1497 (19a), 1454 vs (19b); 1078 s,sh (18b), 1028 m (7b), 699 s (4), 465  $\omega$  (6a). UV (CHCl<sub>3</sub>)  $\lambda_{max}$  422.5 (288000); 487.4 (3670); 520.3 (10190); 555.8 (5200); 599.1 (3395); 657.1 (3230). <sup>1</sup>H NMR: porphyrin moiety -9.42 bs (8H, CH=), -2.82 bs (2H, NH); sugar moiety - 7.43-7.14 m (80H, aromatic H), 5.30 dd (4H,  $J$  = 6.3, 14.7, CH<sub>2</sub>- $\alpha$ ), 5.22 dd (4H,  $J$  = 6.5, 14.7, CH<sub>2</sub>- $\alpha$ ), 5.02 ddd (4H,  $J$  = 2.7, 6.4, 6.4 H-1), 4.53 ddd (4H,  $J$  = 4.4, 4.4, 8.8, H-5), 4.52 d (4H,  $J$  = 11.6, OCH<sub>2</sub>Ph), 4.47 d (4H,  $J$  = 11.6, OCH<sub>2</sub>Ph), 4.39 d (4H,  $J$  = 11.8, OCH<sub>2</sub>Ph), 4.37 d (4H,  $J$  = 11.8, OCH<sub>2</sub>Ph), 4.27 d (4H,  $J$  = 11.8, OCH<sub>2</sub>Ph), 4.24 d (4H,  $J$  = 11.8, OCH<sub>2</sub>Ph), 4.20 dd (4H,  $J$  = 2.8, 4.9, H-4), 4.10 d (4H,  $J$  = 12.0, OCH<sub>2</sub>Ph), 3.96 d (4H,  $J$  = 12.0, OCH<sub>2</sub>Ph), 3.83 m (4H, H-3), 3.83 dd (4H,  $J$  = 8.8, 11.2, H-6a), 3.65 dd (4H,  $J$  = 3.8, 11.2, H-6b), 3.47 bs (4H, H-2). <sup>13</sup>C NMR: porphyrin moiety - 114.43 (*meso* -C=); sugar moiety - 138.37, 138.30, 138.17, 138.06 (each 4C, *ipso*-C aromatic), 128.45, 128.27, 128.25, 128.14, 128.01, 127.91 (each 8C, CH aromatic), 127.80

(4C, CH aromatic), 127.56 (8C, CH aromatic), 127.53 (4C, CH aromatic), 127.25 (8C, CH aromatic), 127.19, 127.11 (each 4C, CH aromatic), 76.43 (4C, C-2), 75.54 (4C, C-1), 74.83 (4C, C-3), 74.51 (4C, C-5), 73.74 (4C, C-4), 73.20, 72.81, 72.59, 72.20 (each 4C,  $\underline{\text{CH}_2\text{Ph}}$ ), 66.72 (4C, C-6), 34.25 (4C,  $\text{CH}_2\text{-}\alpha$ ). MS (m/z, FAB, exact mass 2455.14) 2458.2 (M+3H)<sup>+</sup>.

#### **5,10,15,20-Tetrakis-(2,3,4,6-tetra-O-benzyl- $\alpha$ -D-glucopyranosyl-methyl)porphyrin 4**

IR ( $\text{CHCl}_3$ ) *porphyrin*:  $\nu(\text{NH})$ : 3414 *pyrrole*;  $\nu(\text{C-H})$ : 3090  $\omega$  (20a), 3067  $\omega$  (2), 3033  $\omega$  (20b),  $\nu(\text{ring})$ : 1560, 1468 m,sh, 1397  $\omega$ ; benzene : 1607 m (8a), 1585 m,sh (8b), 1467 (19a), 1454 s (19b); *BnO-*:  $\nu_{\text{as}}(\text{CH}_2)$ : 2928 s;  $\nu_{\text{s}}(\text{CH}_2)$ : 2857 m;  $\beta_{\text{s}}(\text{CH}_2)$ : 1362 m;  $\gamma_{\text{as}}(\text{ring-THP})+\nu_{\text{as}}(\text{COC})$ : 1120 s,br,sh, 1088 vs. UV ( $\text{CHCl}_3$ )  $\lambda_{\text{max}}$  ( $\epsilon$ ) 426.3 (278000); 577.2 (4625); 612.8 (3210); 640.2 (3110). <sup>1</sup>H NMR: porphyrin moiety -9.41 bs (8H, CH=), -2.76 bs (2H, NH); sugar moiety 7.41–7.26 m (48H, aromatic H), 7.14–7.04 m (32H, aromatic H), 5.49 dd (4H,  $J = 3.6, 14.8$ ,  $\text{CH}_2\text{-}\alpha$ ), 5.12 dd (4H,  $J = 7.7, 14.8$ ,  $\text{CH}_2\text{-}\alpha$ ), 5.11 d (4H,  $J = 11.2$ ,  $\text{OCH}_2\text{Ph}$ ), 5.07 ddd (4H,  $J = 3.6, 5.3, 7.7$ , H-1), 5.02 d (4H,  $J = 11.2$ ,  $\text{OCH}_2\text{Ph}$ ), 4.93 d (4H,  $J = 10.9$ ,  $\text{OCH}_2\text{Ph}$ ), 4.62 d (4H,  $J = 11.8$ ,  $\text{OCH}_2\text{Ph}$ ), 4.61 d (4H,  $J = 10.9$ ,  $\text{OCH}_2\text{Ph}$ ), 4.49 ddd (4H,  $J = 2.2, 3.8, 9.6$ , H-5), 4.46 d (4H,  $J = 11.8$ ,  $\text{OCH}_2\text{Ph}$ ), 4.35 dd (4H,  $J = 8.6, 9.2$ , H-3), 4.34 d (4H,  $J = 12.1$ ,  $\text{OCH}_2\text{Ph}$ ), 4.18 d (4H,  $J = 12.1$ ,  $\text{OCH}_2\text{Ph}$ ), 3.90 dd (4H,  $J = 5.3, 9.2$ , H-2), 3.82 dd (4H,  $J = 8.6, 9.6$ , H-4), 3.82 dd (4H,  $J = 3.8, 10.7$ , H-6a), 3.55 dd (4H,  $J = 2.2, 10.7$ , H-6b). <sup>13</sup>C NMR: porphyrin moiety – 115.62 (*meso* -C=); sugar moiety – 138.64, 138.27, 138.05, 137.87 (each 4C, *ipso*-C aromatic), 128.45, 128.44, 128.24, 128.15, 128.06, 127.94, 127.91 (each 8C, CH aromatic), 127.77, 127.66, 127.63, 127.60, 127.40 (each 4C, CH aromatic), 82.38 (4C, C-3), 80.48 (4C, C-1), 80.43 (4C, C-2), 78.18 (4C, C-4), 75.27, 75.04 (each 4C,  $\underline{\text{CH}_2\text{Ph}}$ ), 73.08 (4C, C-5), 73.79, 73.38 (each 4C,  $\underline{\text{CH}_2\text{Ph}}$ ), 69.08 (4C, C-6), 32.05 (4C,  $\text{CH}_2\text{-}\alpha$ ). MS (m/z, FAB, exact mass 2455.14) 2458.2 (M+3H)<sup>+</sup>.

#### **2,6-anhydro-1,3,4,5-tetra-O-benzyl-7,8-dideoxy-8,8-di-1H-pyrrol-2-yl-D-glycero-L-galactooctitol 5**

IR ( $\text{CHCl}_3$ ):  $\nu(\text{NH})$ : 3464 s - free, 3357 m, br ; *pyrrole*:  $\nu(\text{ring})$ : 1564  $\omega$ , 1400 m;  $\beta(\text{C-H})$ : 1271 s; 1253 m,sh; 1028 vs (+benzene 18a), 884 m; 719 vs;  $\nu_{\text{as}}(\text{COC})$  1121 vs, sh; 1093 vs, 884 m, 719 vs; -*OBn*:  $\nu(\text{C-H})$ : 3090 m (20a), 3067 m (2+*pyrrole*), 3033 m (20b);  $\nu(\text{ring})$ : 1603  $\omega$  (8a), 1586  $\omega$  (8b), 1497 (19a), 1454 s (19b),  $\beta_{\text{s}}(\text{CH}_2)$  1369 m,  $\gamma_{\text{s}}(\text{CH}_2)$ : 1332 m; benzene: 1177 m (9a), 1071 m (18b), 1001 m (12), 699 vs (4);  $\gamma_{\text{as}}(\text{CH}_2)$ : 2924m;  $\gamma_{\text{s}}(\text{CH}_2)$ : 2807s. <sup>1</sup>H NMR: pyrrole moiety – 9.00 bs (2H, NH), 6.57 dt (1H,  $J = 1.6, 2.6, 2.6$ , H-5), 6.54 dt (1H,  $J = 1.6, 2.6, 2.6$ , H-5), 6.12 t (1H,  $J = 2.7, 2.7$ , H-4), 6.11 t (1H,  $J = 2.7, 2.7$ , H-4), 6.01 bdt (1H,  $J = 1.6, 2.8, 2.8$ , H-3), 5.81 bdt (1H,  $J = 1.6, 2.8,$

2.8, H-3); sugar moiety – 7.35-7.18 m (20H, aromatic H), 4.62 d (1H,  $J = 11.8$ , OCH<sub>2</sub>Ph), 4.59 d (1H,  $J = 11.8$ , OCH<sub>2</sub>Ph), 4.58 d (1H,  $J = 11.9$ , OCH<sub>2</sub>Ph), 4.57 d (1H,  $J = 11.8$ , OCH<sub>2</sub>Ph), 4.52 d (1H,  $J = 11.8$ , OCH<sub>2</sub>Ph), 4.50 d (1H,  $J = 11.9$ , OCH<sub>2</sub>Ph), 4.49 d (1H,  $J = 11.9$ , OCH<sub>2</sub>Ph), 4.39 d (1H,  $J = 11.9$ , OCH<sub>2</sub>Ph), 4.23 dd (1H,  $J = 3.9, 11.3$ , CH-β), 4.18 ddd (1H,  $J = 3.2, 4.6, 8.0$ , H-5), 4.07 dd (1H,  $J = 8.0, 11.2$ , H-6b), 3.98 dd (1H,  $J = 2.9, 4.6$ , H-4), 3.88 dt (1H,  $J = 2.0, 2.0, 11.1$ , H-1), 3.71 dd (1H,  $J = 2.9, 6.1$ , H-3), 3.57 dd (1H,  $J = 3.2, 11.2$ , H-6a), 3.52 dd (1H,  $J = 2.0, 6.1$ , H-2), 2.44 ddd (1H,  $J = 3.9, 11.3, 13.8$ , CH<sub>2</sub>-α), 1.77 bt (1H,  $J = 12.6$ , CH<sub>2</sub>-α). <sup>13</sup>C NMR: pyrrole moiety – 133.09 and 133.88 (C-2), 116.39 and 116.65 (C-5), 107.75 and 107.93 (C-4), 104.56 and 105.25 (C-3); sugar moiety – 138.36, 138.18, 137.91, 137.87 (each C, *ipso*-C aromatic), 128.45, 128.36 (each 2C, CH aromatic), 128.31 (4C, CH aromatic), 128.06 (2C, CH aromatic), 127.83 (3C, CH aromatic), 127.73, 127.69 (each C, CH aromatic), 127.65 (2C, CH aromatic), 127.53 (1C, CH aromatic), 127.46 (2C, CH aromatic), 76.66 (C-2), 75.21 (C-3), 73.93 (C-4), 72.95, 72.95, 72.93, 72.90 (CH<sub>2</sub>Ph), 72.46 (C-5), 67.11 (C-6), 34.53 (C-α), 33.58 (C-β). MS (m/z, FAB, Exact Mass 682.34): 682.5 (M)<sup>+</sup>.

## **2,6-anhydro-1,3,4,5-tetra-O-benzyl-7,8-dideoxy-8,8-di-1H-pyrrol-2-yl-D-glycero-L-gulo-octitol** **6**

IR (CHCl<sub>3</sub>):  $\nu$ (NH): 3461 s - free, 3376 m, br - fixed;  $\beta$ (NH): 1121 vs,sh;  $\gamma$ (NH): 554 m,br, sh, *pyrrole*:  $\nu$ (C-H): 3106  $\omega$ ;  $\nu$ (ring): 1563  $\omega$ , 1468 m,sh, 1400 m;  $\beta$ (C-H): 1271 m;  $\gamma$ (C-H): 884  $\omega$ ;  $\beta$ (ring)+  $\gamma$ (C-H): 718 vs;  $\gamma$ (ring): 634  $\omega$ ;  $\nu_{as}$ (COC),  $\nu$ (ring) THP: 1087 vs, br, 1121 vs, sh; *benzene*:  $\nu$ (C-H): 3090 m (20a), 3067 m (2), 3033 m (20b);  $\nu$ (ring): 1604  $\omega$  (8a), 1586  $\omega$  (8b), 1497 (19a), 1454 s (19b), 1178 m, sh (9a), 1155 s (9b), 1074 vs,sh (18b), 1028 vs (18a), 912 m (17b), 700 vs (4), 467 m (6a). <sup>1</sup>H NMR: pyrrole moiety – 8.27 bs (1H, NH), 7.92 bs (1H, NH), 6.57 dt (1H,  $J = 1.5, 2.7, 2.7$ , H-5), 6.55 dt (1H,  $J = 1.5, 2.7, 2.7$ , H-5), 6.12 t (1H,  $J = 2.7$ , H-4), 6.11 t (1H,  $J = 2.7$ , H-4), 6.04 bdt (1H,  $J = 1.5, 2.7, 2.7$ , H-3), 5.97 bdt (1H,  $J = 1.5, 2.7, 2.7$ , H-3); sugar moiety – 7.36-7.13 m (20H, aromatic H), 4.91 d (1H,  $J = 10.9$ , OCH<sub>2</sub>Ph), 4.82 d (1H,  $J = 10.9$ , OCH<sub>2</sub>Ph), 4.77 d (1H,  $J = 10.9$ , OCH<sub>2</sub>Ph), 4.60 d (1H,  $J = 12.0$ , OCH<sub>2</sub>Ph), 4.54 d (1H,  $J = 11.6$ , OCH<sub>2</sub>Ph), 4.51 d (1H,  $J = 12.0$ , OCH<sub>2</sub>Ph), 4.48 d (1H,  $J = 10.9$ , OCH<sub>2</sub>Ph), 4.44 d (1H,  $J = 11.6$ , OCH<sub>2</sub>Ph), 4.20 dd (1H,  $J = 3.9, 11.5$ , CH-β), 4.00 ddd (1H,  $J = 3.1, 5.9, 11.7$ , H-1), 3.80 t (1H,  $J = 9.0$ , H-3), 3.73 ddd (1H,  $J = 2.1, 5.2, 9.8$ , H-5), 3.67 dd (1H,  $J = 2.1, 10.3$ , H-6b), 3.66 dd (1H,  $J = 5.9, 9.2$ , H-2), 3.63 dd (1H,  $J = 5.2, 10.3$ , H-6a), 3.50 dd (1H,  $J = 8.7, 9.8$ , H-4), 2.43 ddd (1H,  $J = 3.9, 11.7, 14.6$ , CH<sub>2</sub>-α), 2.17 ddd (1H,  $J = 3.1, 11.5, 14.6$ , CH<sub>2</sub>-α). <sup>13</sup>C NMR: pyrrole moiety – 132.17 and 133.73 (C-2), 116.70 and 116.87 (C-5), 108.17 and 108.08 (C-4), 105.84 and 104.66 (C-3); sugar moiety – 138.60, 138.10, 138.02, 137.89 (each C, *ipso*-C aromatic), 128.42, 128.39, 128.37, 128.37, 127.90,

127.89, 127.85 (each 2C, CH aromatic), 127.78, 127.74 (each C, CH aromatic), 127.74 (2C, CH aromatic), 127.71, 127.60 (each C, CH aromatic), 82.43 (C-3), 79.72 (C-2), 78.32 (C-4), 75.34, 74.94, 73.46, 72.78 ( $\underline{\text{C}}\text{H}_2\text{Ph}$ ), 71.38 (C-5), 71.28 (C-1), 69.54 (C-6), 33.37 (C- $\beta$ ), 30.63 (C- $\alpha$ ). MS (m/z, FAB, Exact Mass 682.34): 682.5 (M)<sup>+</sup>.

### **5,15-[Bis-(pentafluorophenyl)]-10,20-[bis-(2,3,4,6-tetra-O-benzyl- $\alpha$ -D-galactopyranosyl-methyl)porphyrin 7**

IR ( $\text{CHCl}_3$ ) *porphyrin*:  $\nu(\text{NH})$ : 3414  $\omega$ ;  $\nu(\text{ring})$ : 1567  $\omega$ , 1470 m,sh;  $\beta(\text{ring})$ : 803  $\omega$ ;  $\text{C}_6\text{F}_5$ :  $\nu(\text{ring})$ : 1651  $\omega$  (8a), 1520 s (19a) 1498 vs (19b); 1437  $\omega$  (2), 1315  $\omega$  (13), 1248  $\omega$  (14), 1142 m (7b), 1121 s (7a), 990 s (20b) 919 m, 924 m,sh (20a); *BnO*-.  $\nu(\text{C}=\text{H})$ : 3090  $\omega$  (20a), 3067  $\omega$  (2), 3033  $\omega$  (20b);  $\nu(\text{ring})$ : 1604  $\omega$ ,sh (8a), 1568  $\omega$  (8b), 1455 m (19b); 1280  $\omega$  (13) 1029 m (18a), 699 s (4), 464  $\omega$  (6a);  $\nu_{\text{as}}(\text{COC})$ : 1090s, 1121 s;  $\nu_{\text{as}}(\text{CH}_2)$ : 2932  $\omega$ ;  $\nu_{\text{s}}(\text{CH}_2)$ : 2874 m;  $\beta_{\text{s}}(\text{CH}_2)$ : 1366 m;  $\gamma_{\text{s}}(\text{CH}_2)$  1333 m. UV ( $\text{CHCl}_3$ )  $\lambda_{\text{max}}$  417.0 (249000); 480 (12800); 513 (19800); 546 (9530); 589 (7909); 647 (4967). <sup>1</sup>H NMR: porphyrin moiety – 9.54 d (4H,  $J = 4.9$ , CH=), 8.63 d (4H,  $J = 4.9$ , CH=), -2.73 bs (2H, NH); sugar moiety – 7.40–7.26 m (48H, aromatic H), 6.75–7.05 m (32H, aromatic H), 5.30 dd (4H,  $J = 5.5, 14.8$ , CH<sub>2</sub>- $\alpha$ ), 5.22 dd (4H,  $J = 6.5, 14.8$ , CH<sub>2</sub>- $\alpha$ ), 5.10 dt (4H,  $J = 3.0, 6.1, 6.1$ , H-1), 4.67 d (4H,  $J = 11.8$ , OCH<sub>2</sub>Ph), 4.61 d (4H,  $J = 11.6$ , OCH<sub>2</sub>Ph), 4.61 d (4H,  $J = 12.0$ , OCH<sub>2</sub>Ph), 4.60 ddd (4H,  $J = 3.6, 4.6, 7.9$ , H-5), 4.60 d (4H,  $J = 11.8$ , OCH<sub>2</sub>Ph), 4.47 d (4H,  $J = 11.6$ , OCH<sub>2</sub>Ph), 4.44 d (4H,  $J = 12.0$ , OCH<sub>2</sub>Ph), 4.27 dd (4H,  $J = 2.7, 4.6$ , H-4), 4.09 d (4H,  $J = 12.0$ , OCH<sub>2</sub>Ph), 4.05 d (4H,  $J = 12.0$ , OCH<sub>2</sub>Ph), 4.00 dd (4H,  $J = 2.7, 6.0$ , H-3), 3.89 dd (4H,  $J = 7.9, 11.1$ , H-6a), 3.75–3.78 m (4H, H-2), 3.70 dd (4H,  $J = 3.6, 11.1$ , H-6b). <sup>13</sup>C NMR: porphyrin moiety – 147.55 (4C, -(N)C=), 145.60 (4C, -(N)C=), 130.38 (4C, -CH=), 129.92 (4C, -CH=), 117.77 (2C, *meso*-C=), 117.07 (2C,  $J_{\text{CF}} = 20.0$ , *meso*-C=); sugar moiety – 138.33, 138.20, 138.13, 138.11 (each 2C, *ipso*-C aromatic), 128.49, 128.33, 128.21, 128.06, 127.90, 127.69, 127.52 (each 4C, CH aromatic), 127.00, 126.77 (each 2C, CH aromatic), 76.74 (2C, C-2), 76.11 (2C, C-1), 75.62 (2C, C-3), 74.49 (2C, C-5), 73.96 (2C, C-4), 73.30, 72.59, 72.97, 72.84 (each 2C,  $\underline{\text{C}}\text{H}_2\text{Ph}$ ), 67.14 (2C, C-6). MS (m/z, FAB, Exact Mass 1714.60): 1716.7 (M+2H)<sup>+</sup>.

### **5,15-[Bis-(pentafluorophenyl)]-10,20-[bis-( $\alpha$ -D-galactopyranosyl-methyl)porphyrin 10**

To a solution of porphyrin 7 (100 mg, 0.058 mmol) in  $\text{CH}_2\text{Cl}_2$  1 ml and MeOH 2 ml 10% Pd(C) 90 mg was added. The reaction mixture was stirred under H<sub>2</sub> (atmospheric pressure) at ambient temperature for one night. After filtration silica gel was added and solvents were evaporated under reduced pressure. Resulting powder was posed at the top of a short silica gel

column. Increasing polarity elution with  $\text{CHCl}_3$ ,  $\text{CHCl}_3$ :MeOH 2:1 gave porphyrin **10** (37 mg, 63%) as dark green amorphous solid.

UV (MeOH)  $\lambda_{\text{max}}$  410 (54600); 510 (5180); 543 (2340); 589 (1950); 647 (1970).  $^1\text{H}$  NMR 300 MHz ( $\text{CD}_3\text{OD}$ ): porphyrin moiety – 9.90 bs (4H), 9.05 bs (4H); sugar moiety – 4.05-3.52 m (18H).  $^{13}\text{C}$  NMR 75 MHz ( $\text{CD}_3\text{OD}$ ): 151.17, 149.11, 145.19, 141.17, 137.73, 133.72, 129.79, 129.66, 71.51, 71.12, 70.89, 70.67, 70.55, 70.21, 69.97, 37.76. For  $\text{C}_{46}\text{H}_{36}\text{F}_{10}\text{N}_4\text{O}_{10}$  (Exact Mass 994.23) MS (m/z, FAB): 995.0 (M+H)<sup>+</sup>, 1011.1 (M+H<sub>2</sub>O)<sup>+</sup>.

## Acknowledgments

*This work was supported by the Ministry of Education, Youth and Sports of the Czech Republic, with projects No. MSM6046137305 (LK), 203/06/0006 (PD), 1P04OCD31.001 (MD), 2B06024-SUPRAFYT of the National Research Program II (JM), and was a part of project Z4 055 0506 (DS, PS). We are indebted to Dr. P. Fiedler for taking and interpretation of IR spectra. Mass spectra were measured by the Mass Spectroscopy Laboratory of the IOCB (Dr. K. Ubik, Head), elemental analyses were done by the Analytical Department of the IOCB (Dr. L. Váchová, head).*

## REFERENCES
